# Supplementary material for: Synthesis, structure and characterization of a layered coordination polymer based on Zn(ii) and 6-(methylmercapto)purine
Source: Royal Society of Chemistry journal article supplement (doi:10.1039/c5ra23134e), 2015-12-15
Supplement: c5ra23134e1.pdf [file c5ra23134e1.pdf]

## SUPPLEMENTARY INFORMATION

# Synthesis, structure and characterization of a layered coordination polymer based on Zn(II) and 6-(methylmercapto)purine

*Adelaida Perea-Cachero,<sup>a</sup> Beatriz Seoane,<sup>ab</sup> Beatriz Diosdado,<sup>c</sup> Carlos Téllez,<sup>\*a</sup> and  
Joaquín Coronas<sup>a</sup>*

<sup>a</sup>Chemical and Environmental Engineering Department and Instituto de Nanociencia de Aragón (INA), Universidad de Zaragoza, 50018 Zaragoza, Spain.

<sup>b</sup>Catalysis Engineering, ChemE, Delft University of Technology, 2628 BL Delft, The Netherlands.

<sup>c</sup>X-ray Diffraction and Fluorescence Analysis Service, Universidad de Zaragoza, 50009 Zaragoza, Spain.

\*E-mail: ctellez@unizar.es.

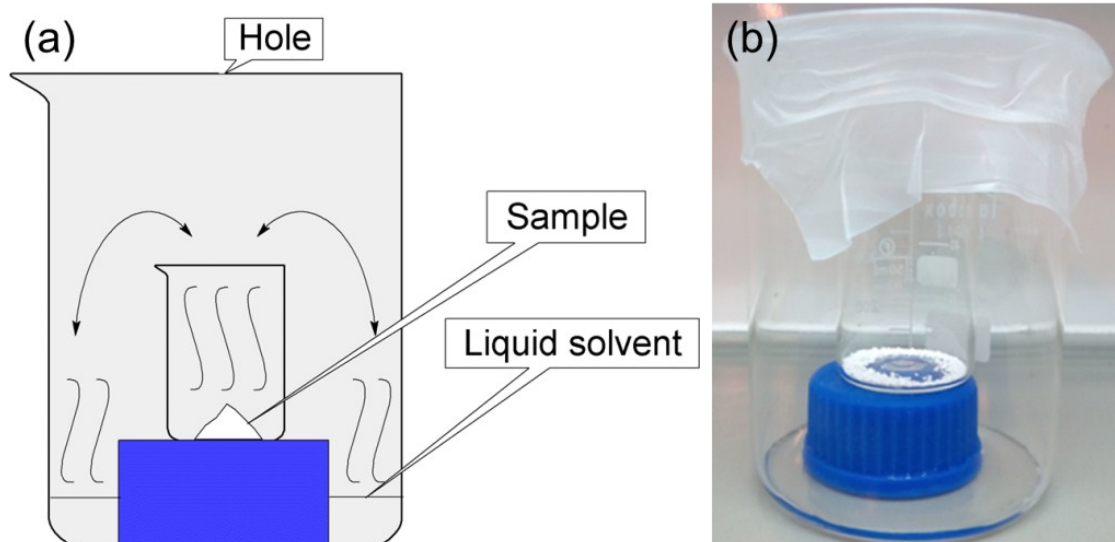

**Fig. S1** Set-up for the solvent exchange in vapour phase. (a) Schematic illustration and (b) photograph.

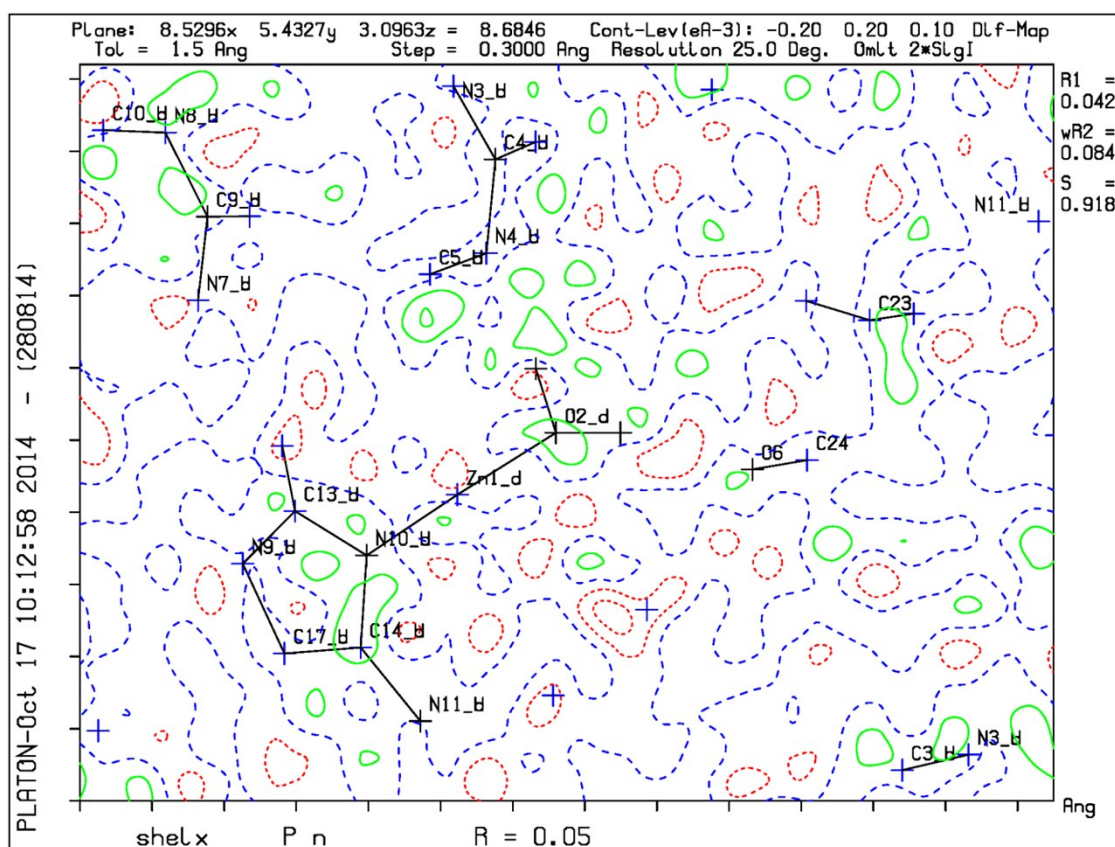

**Fig. S2** Difference electron density map of structure 1.

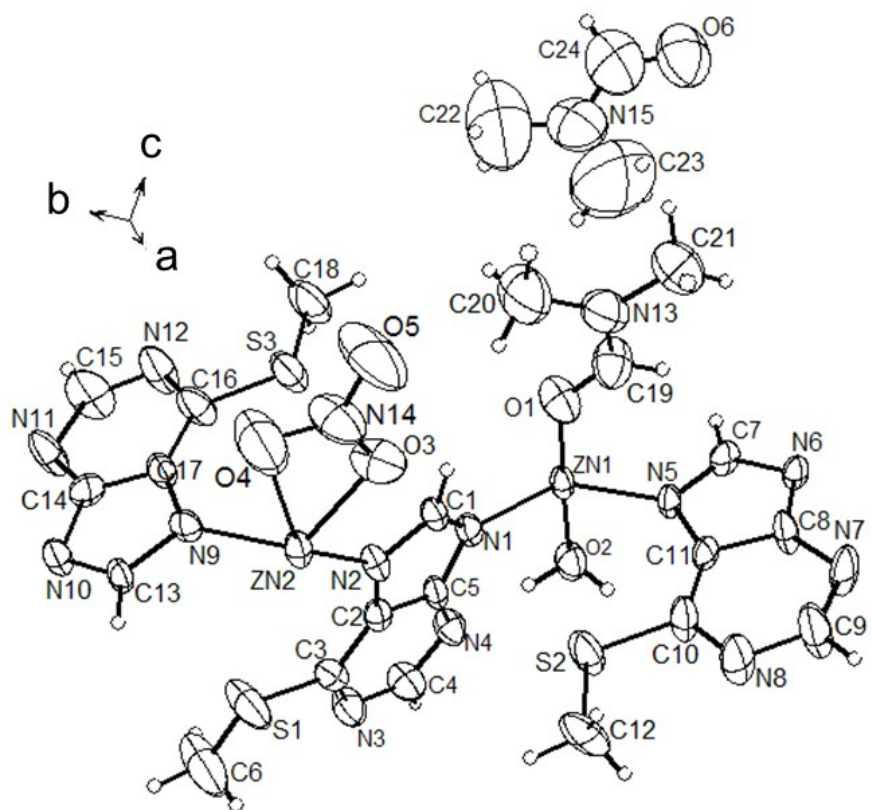

Fig. S3 ORTEP view of **1**.

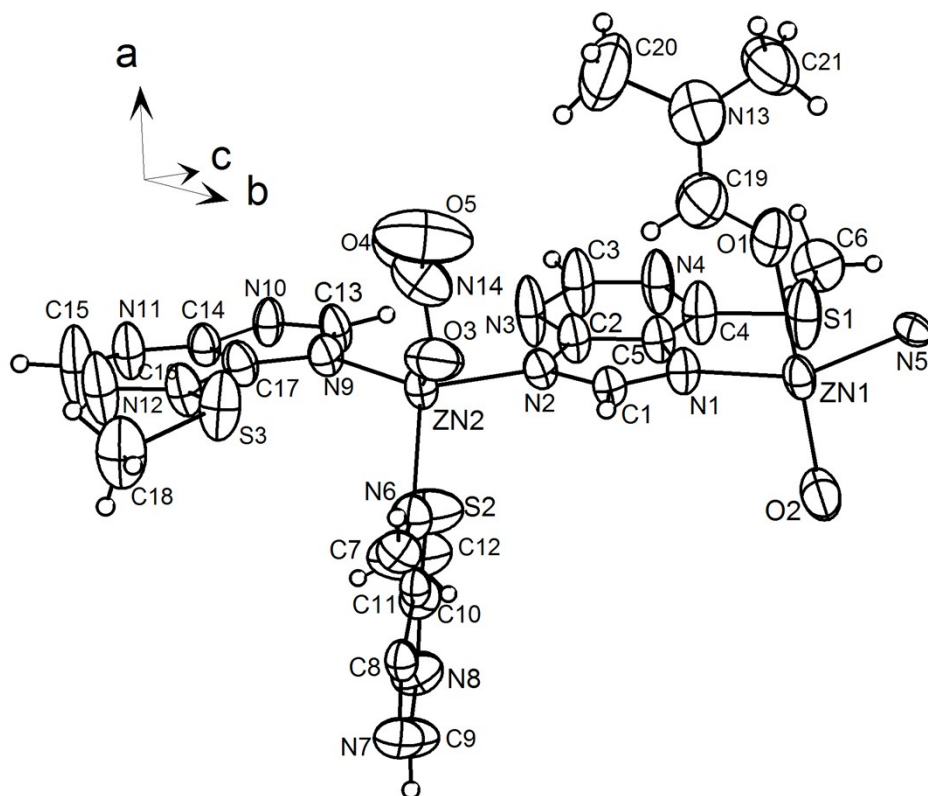

Fig. S4 ORTEP view of **1'**.

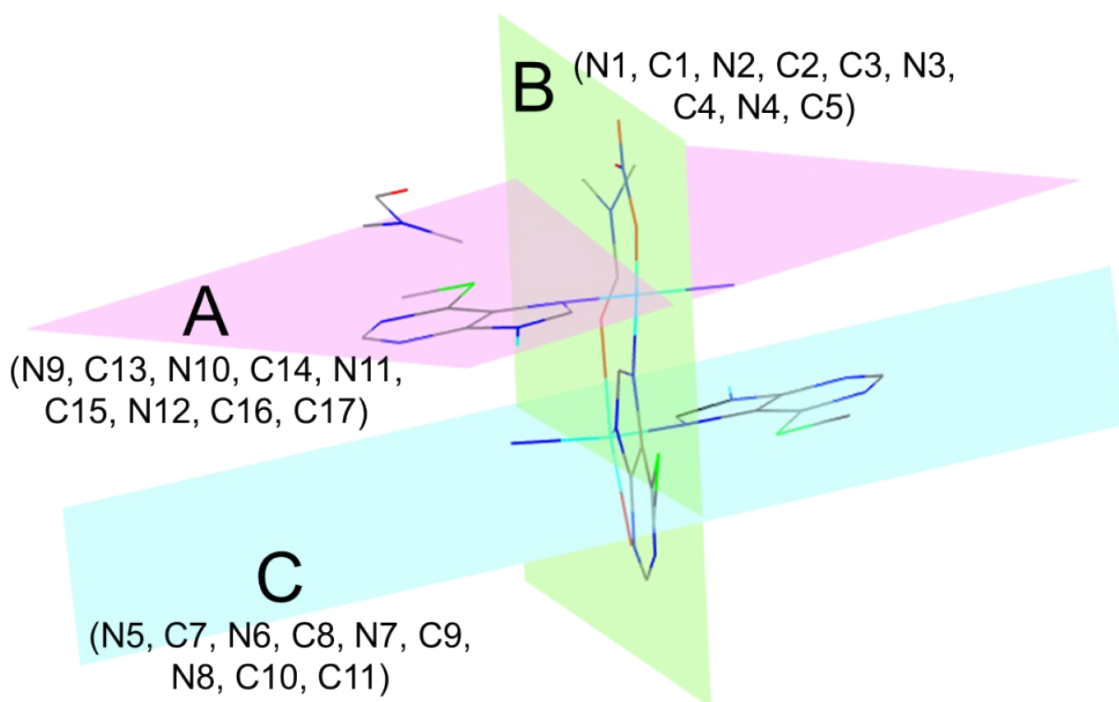

**Fig. S5** Structure **1**. Calculated least squares planes. A (pink): defined by N9, C13, N10, C14, N11, C15, N12, C16, and C17 atoms. B (green): defined by N1, C1, N2, C2, C3, N3, C4, N4, and C5 atoms. C (red): defined by N5, C7, N6, C8, N7, C9, N8, C10, and C11 atoms. Dihedral angles: AB, 83.01°; AC, 3.95°; BC, 79.85°. Zn, N, C, O, and S atoms are represented in blue, dark blue, grey, red and green, respectively. H atoms omitted for clarity.

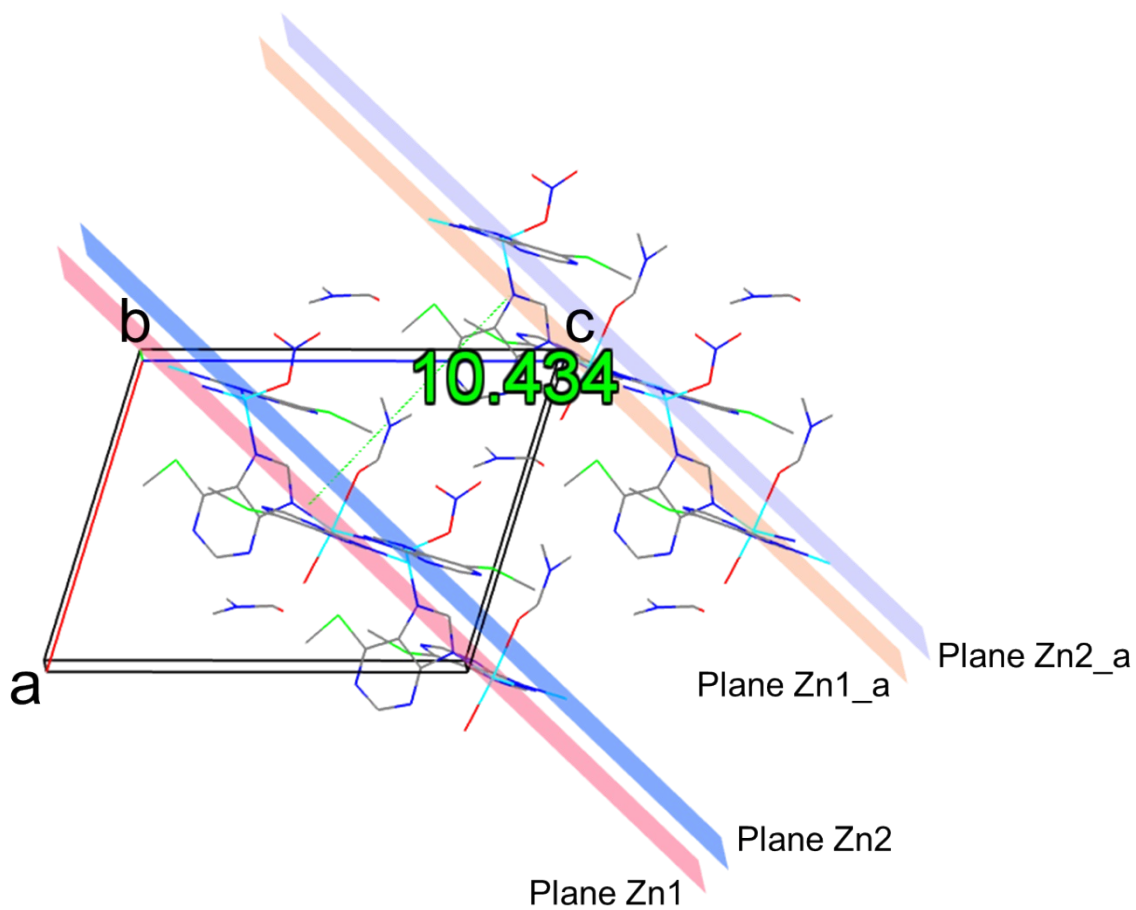

**Fig. S6 Structure 1.** Distance between layers (defined by the distance in ångströms (Å) between two planes of the same kind of Zn atoms). Zn, N, C, O, and S atoms are represented in blue, dark blue, grey, red and green, respectively. H atoms omitted for clarity.

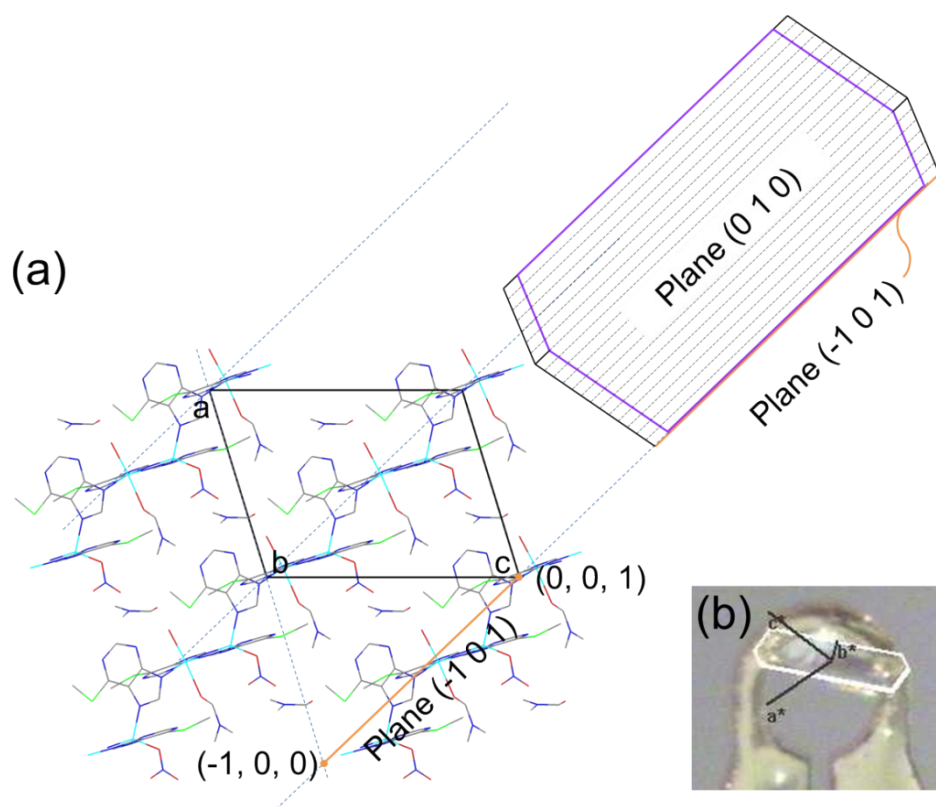

**Fig. S7.** (a) Correspondence between the crystal structure and shape of **1**. Zn, N, C, O, and S atoms are represented in blue, dark blue, grey, red and green, respectively. H atoms omitted for clarity. (b) Optical image of a single crystal (type II) of **1** where the polyhedron edges and the reciprocal cell axes are drawn using CrysAlis software.<sup>1</sup>

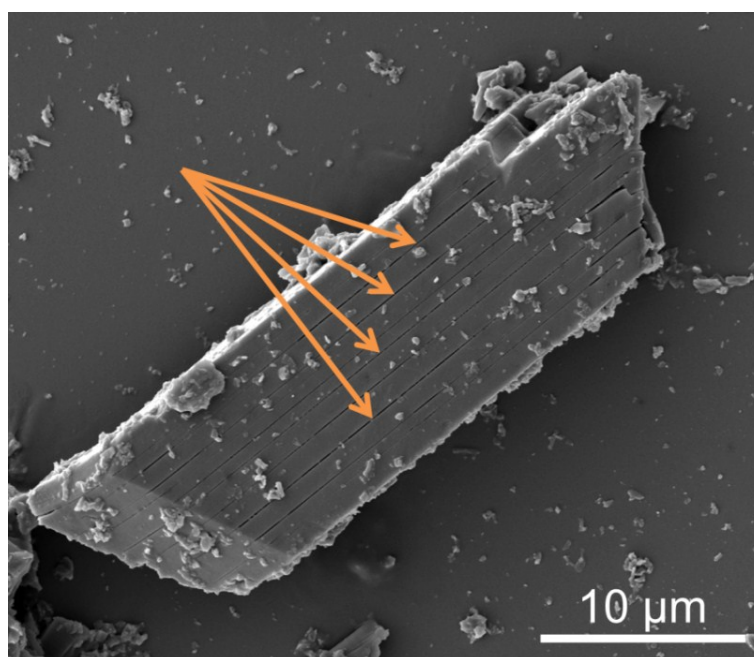

**Fig. S8** SEM image of **1** where marks are observed.

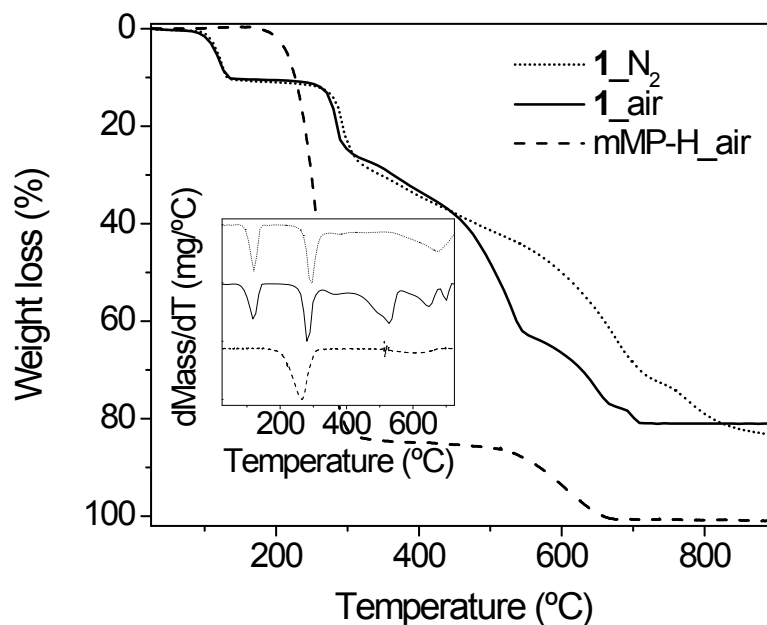

**Fig. S9** TGA and DTG (inset) characterization of **1** under air and nitrogen conditions and mMP-H under air atmosphere.

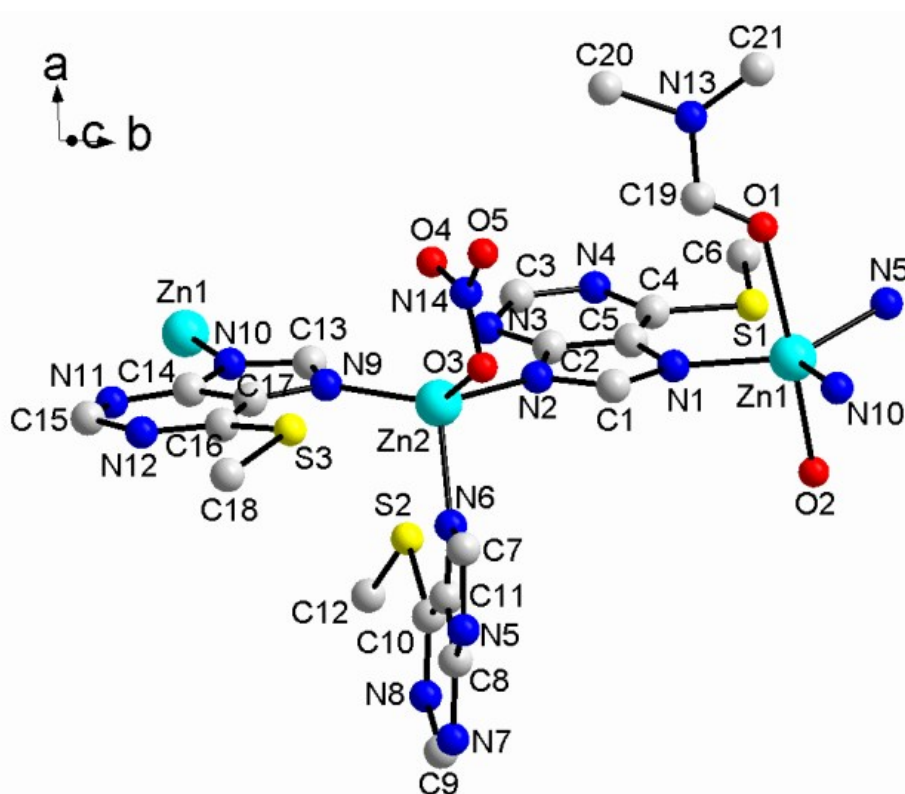

**Fig. S10** Crystal structure of **1'** displaying the asymmetric unit. Zn, N, C, O, and S atoms coloured in blue, dark blue, grey, red and green, respectively. H atoms are omitted for clarity.

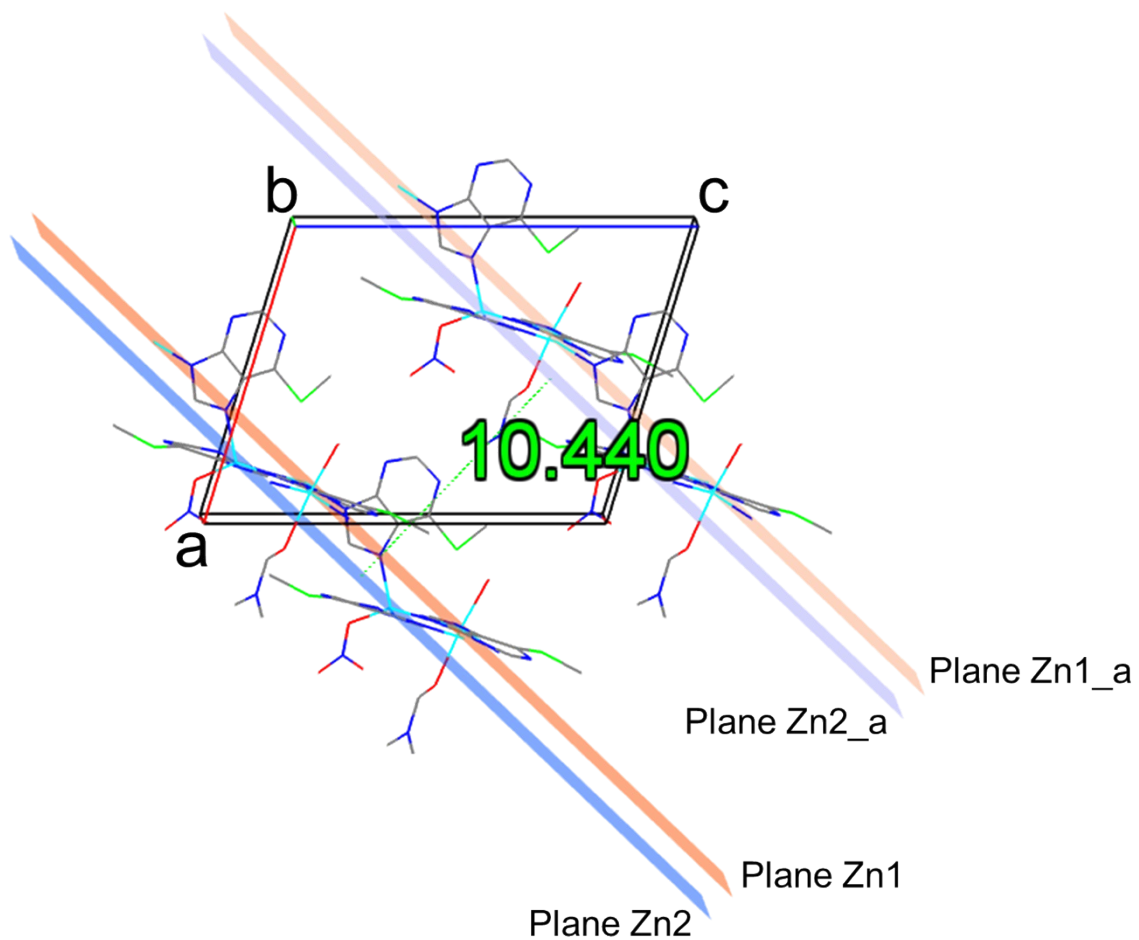

**Fig. S11** Structure 1'. Distance between layers (defined by the distance in ångströms (Å) between two planes of the same type of Zn atoms). Zn, N, C, O, and S atoms are represented in blue, dark blue, grey, red and green, respectively. H atoms omitted for clarity



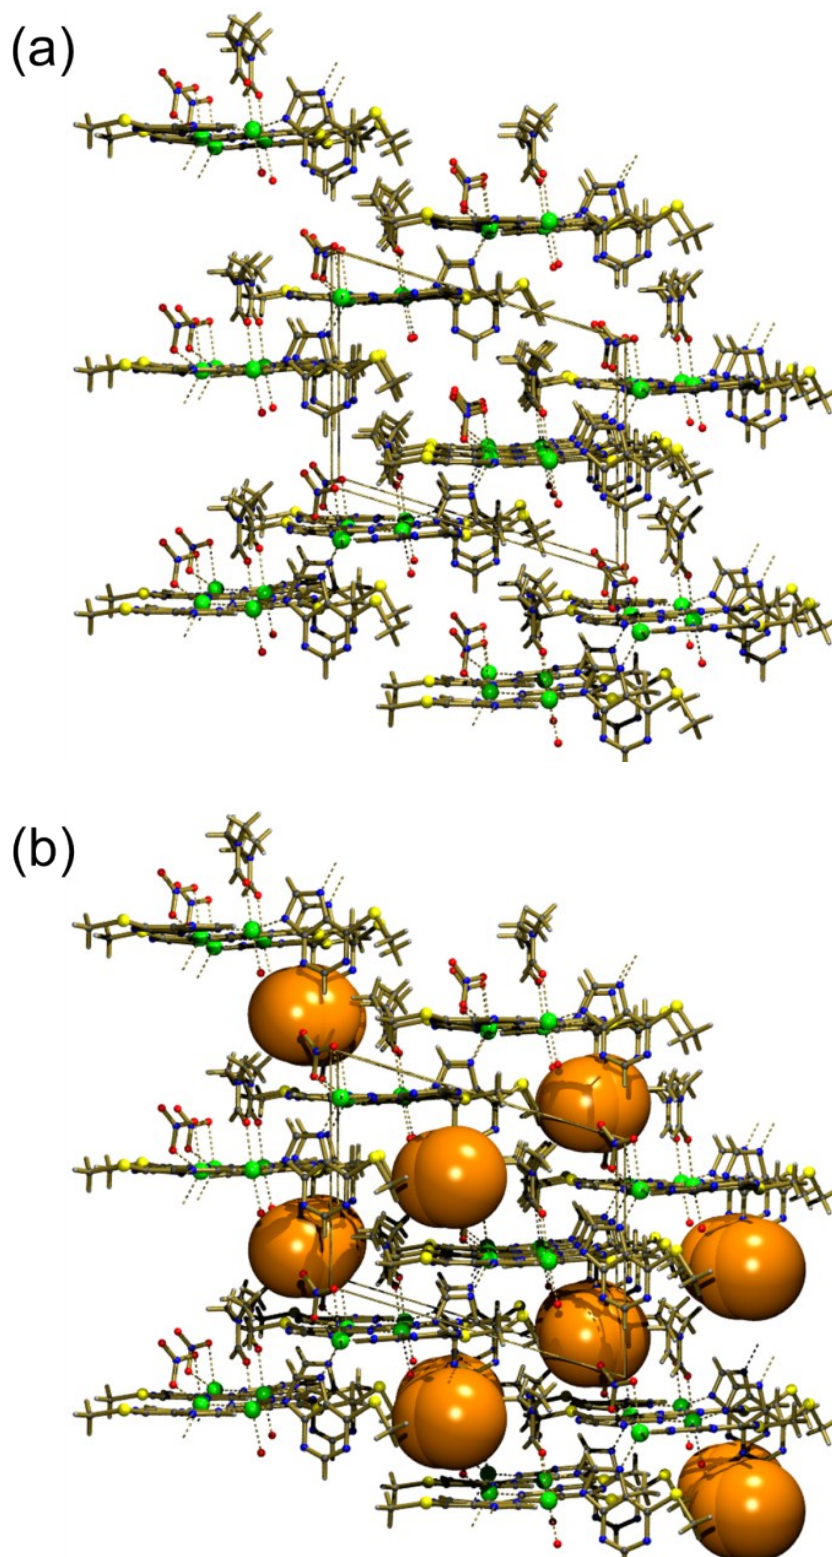

**Fig. S12** Solvent accessible void volume of compound **1'** determined by PLATON/SQUEEZE<sup>55</sup> (view along the *b* axis). Empty cavities in (a) are represented by orange spheres in (b). Zn, N, C, O, H, and S atoms are depicted in green, dark blue, grey, red, light grey, and yellow, respectively. H atoms omitted for clarity.

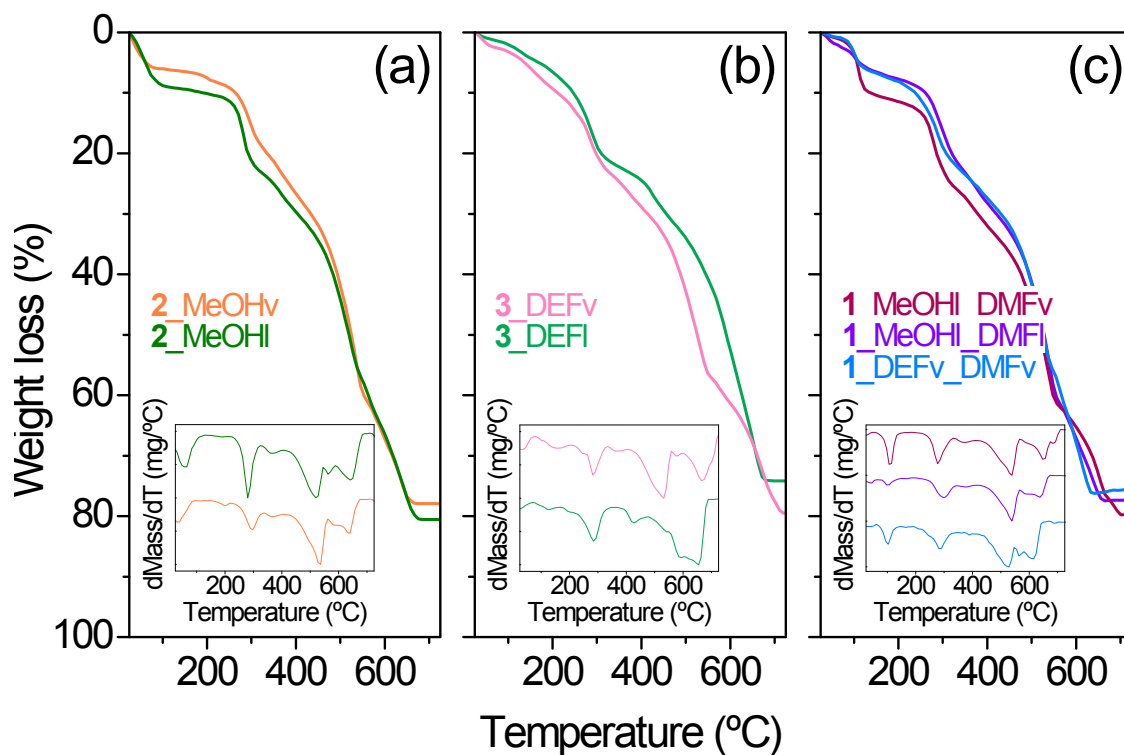

**Fig. S13** TGA and DTG (insets) characterization under air flow of products obtained after: exchange of DMF for (a) MeOH and (b) DEF, and (c) framework recovery.

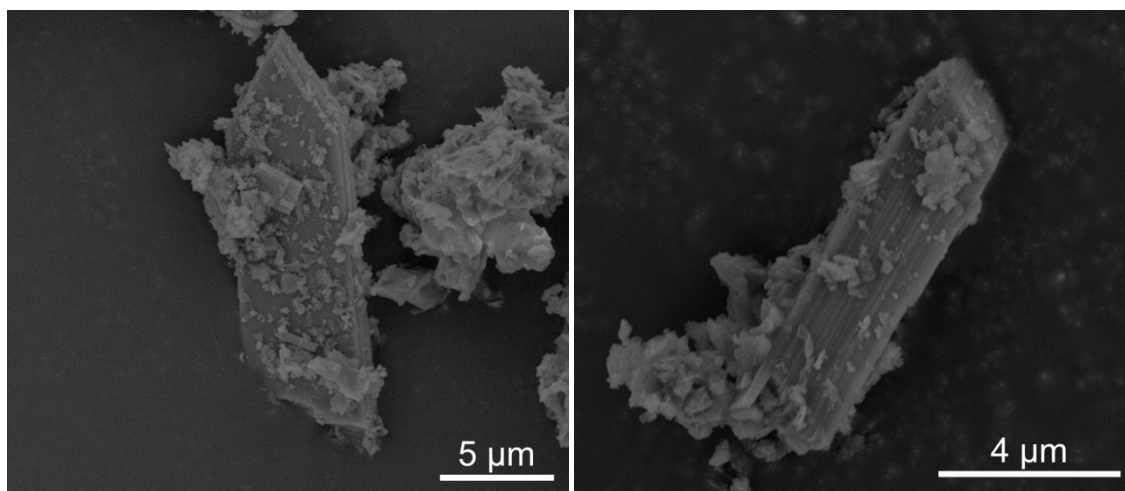

**Fig. S14** SEM images of 2\_MeOHl.

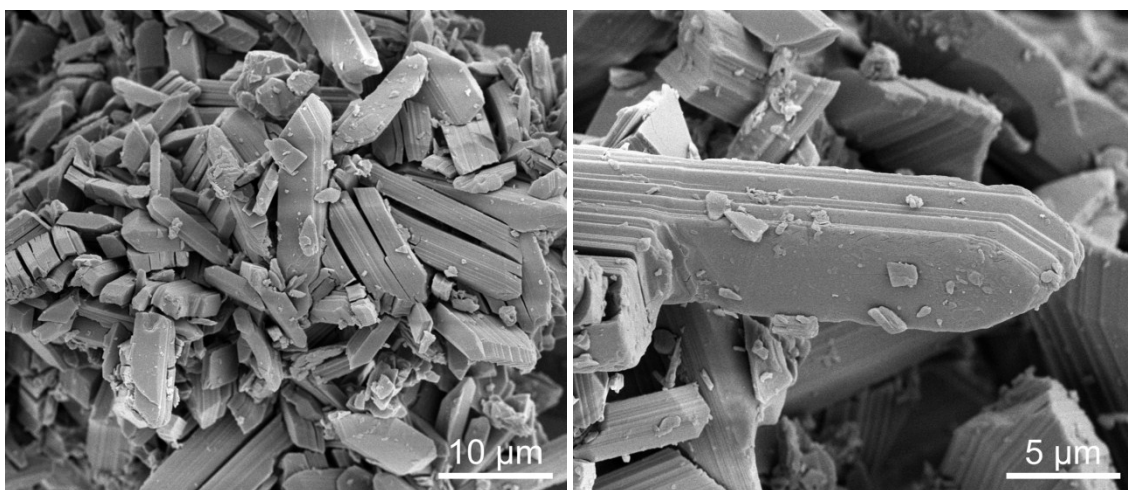

Fig. S15 SEM images of 2\_MeOHv.

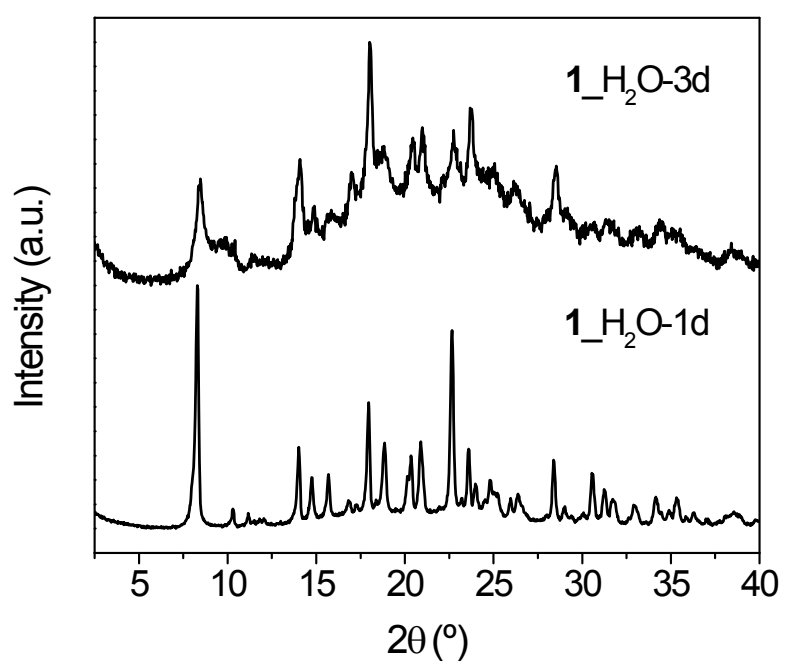

Fig. S16 PXRD patterns of product 1 soaked in H<sub>2</sub>O after 1 (1\_H<sub>2</sub>O-1d) and 3 d (1\_H<sub>2</sub>O-3d).

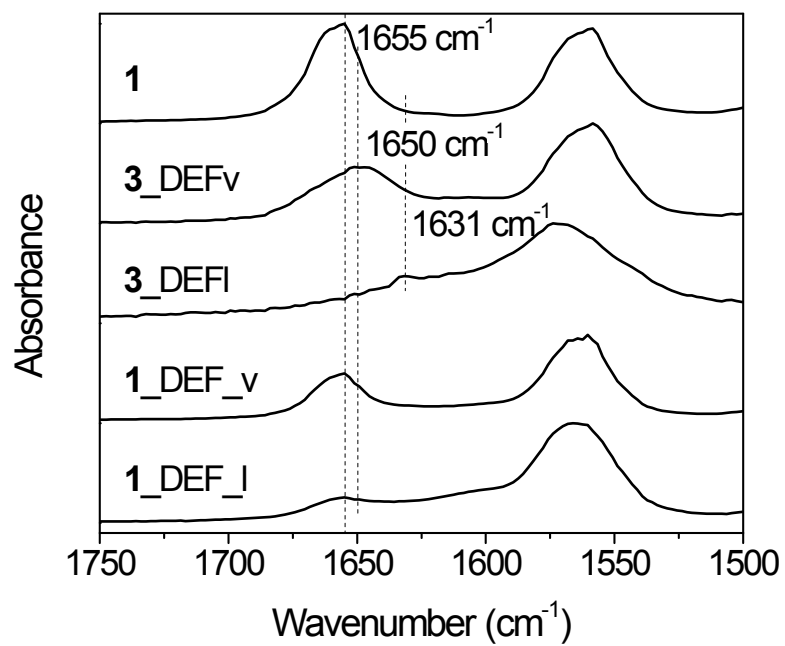

**Fig. S17** FTIR spectra detail for comparison of **1**, **3\_DEFv**, **3\_DEF\_I**, **1\_DEFv\_DMfv** and **1\_DEFv\_DMFI** between 1500 and 1750 cm<sup>-1</sup> showing the displacement of C=O band towards smaller wavenumbers.

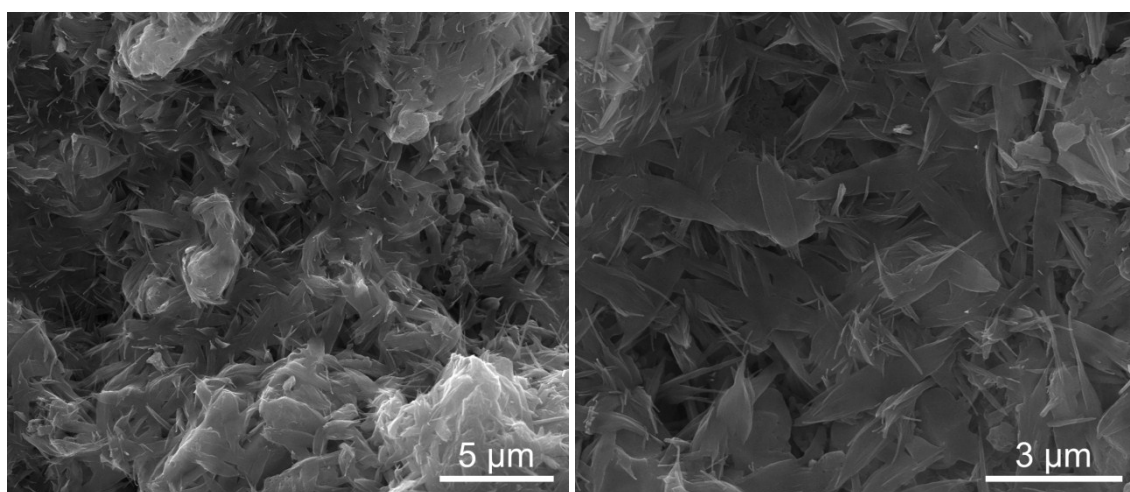

**Fig. S18** SEM images of **3\_DEFv**.

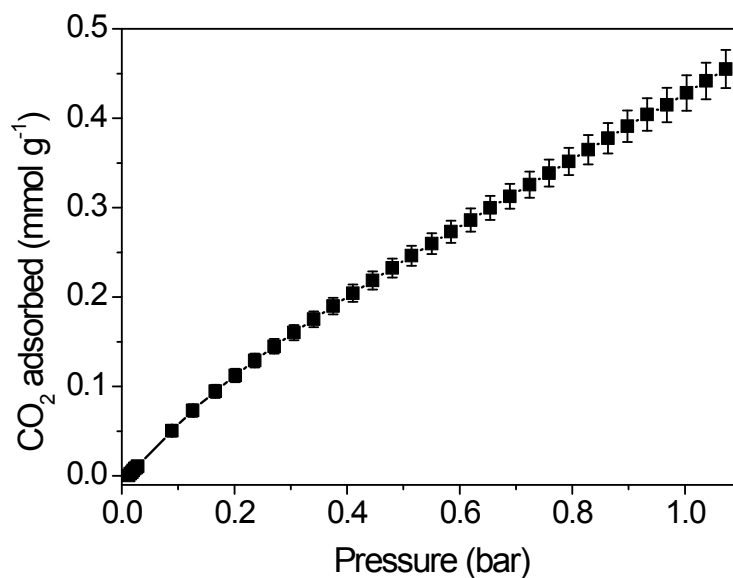

**Fig. S19** Adsorption isotherm of CO<sub>2</sub> at 273 K on **2\_MeOHv**. Error bars show standard errors of mean for 4 measurements on the same sample.

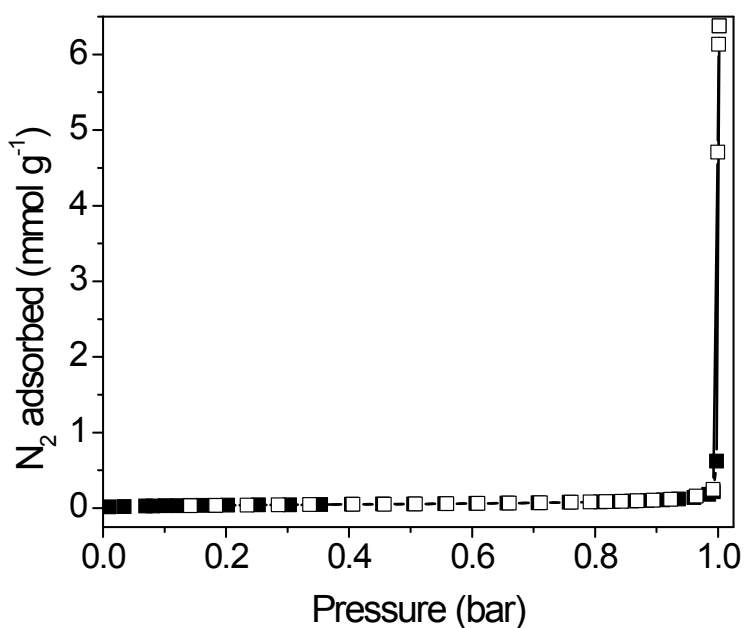

**Fig. S20** N<sub>2</sub> sorption of compound **2\_MeOHv**. Filled and open squares for adsorption and desorption, respectively.

## References

- 1 *CrisAlisPro Software*, Version 1.171.37.31 (release 14-01-2014 CrysAlis171 .NET), Agilent Technologies UK Ltd: Oxford, UK, 2014.
